# Supplementary material for: Diagnostic value of serum sphingolipids in patients with colorectal cancer
Source: Royal Society of Chemistry journal article supplement (doi:10.1039/d1an02239c), 2022-01-01
Supplement: d1an02239c1.pdf [file d1an02239c1.pdf]

## Supplementary Information

### Diagnostic value of serum sphingolipids in patients with colorectal cancer

Ziyue Pan<sup>a</sup>, Zuojian Hu<sup>b</sup>, Li Guan<sup>c</sup>, Lei Zhang<sup>d</sup>, Xia Gao<sup>d</sup>, Lujie Yang<sup>d</sup>, Tianqi Gong<sup>d</sup>, Yanling Hu<sup>\*a</sup>, Yanping Zhao<sup>\*a</sup> and Hongxiu Yu<sup>\*a,d</sup>

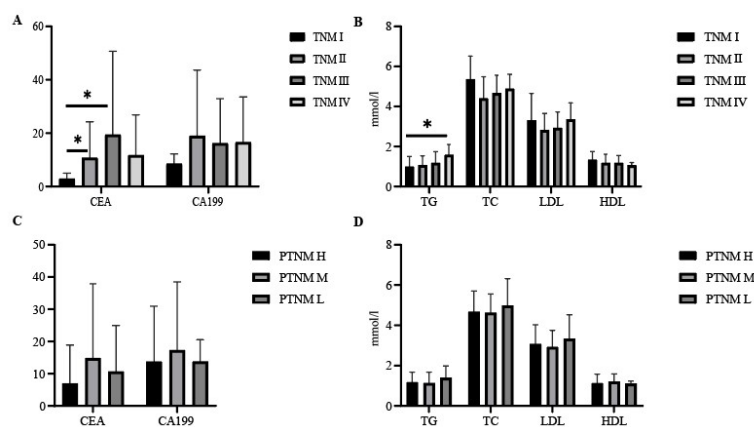

Figure S1. Serum lipids and tumor biomarkers levels of patients with CRC in different stages. \*p < 0.05.

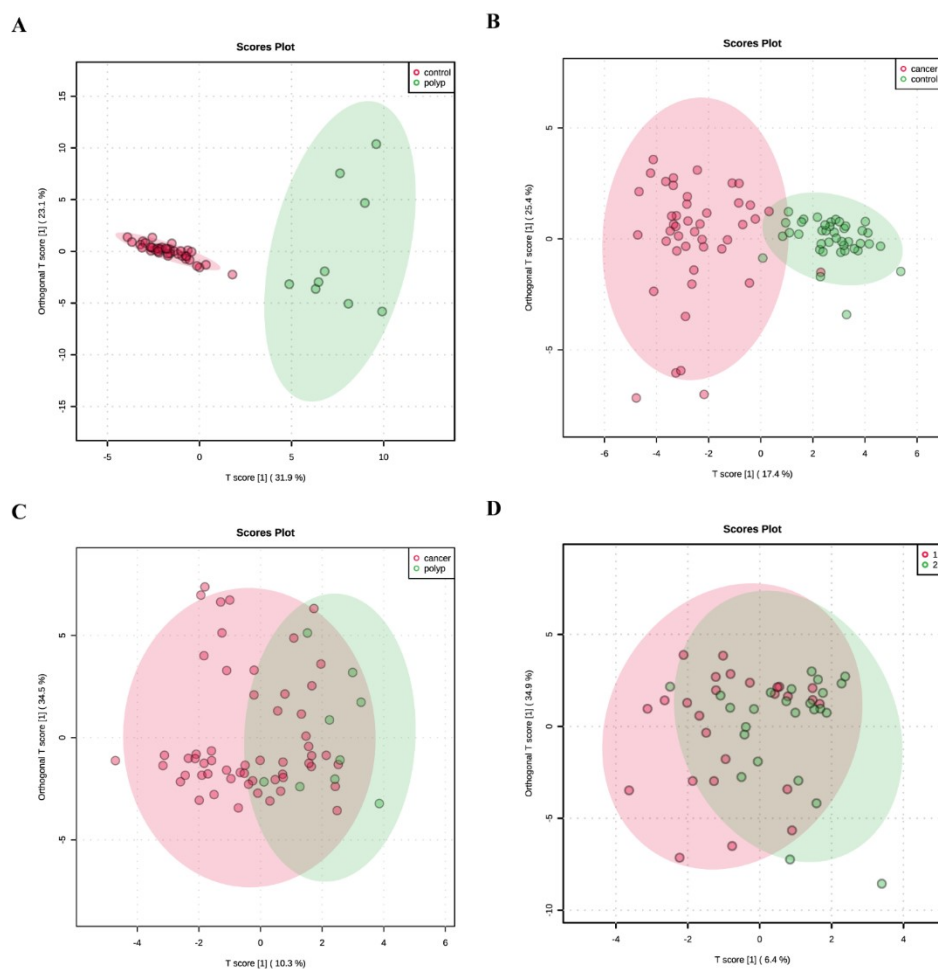

**Figure S2. OPLS-DA analysis between groups.** (a) OPLS-DA analysis showed distinct metabolic profiles between polyp patients and the healthy; (b) OPLS-DA analysis showed distinct metabolic profiles between CRC patients and the healthy; (c) OPLS-DA analysis showed overlapped metabolites between polyp and CRC patients; (d) OPLS-DA analysis showed overlapped metabolites between early-stage and advanced-stage CRC patients.

**Table S1. Identification of lipid species**

| metabolites        | precursor ion | product ions | CE   | DP |
|--------------------|---------------|--------------|------|----|
| So (d16:1)         | 272.4         | 254.3        | 12.3 | 60 |
| Sa (d16:0)         | 274.4         | 256.3        | 12.4 | 60 |
| So (d18:1)         | 300.4         | 282.3        | 13.7 | 60 |
| Sa (d18:0)         | 302.4         | 284.3        | 13.8 | 60 |
| S1P(d18:1)         | 380.3         | 264.3        | 17.6 | 60 |
| S1P(d17:1)         | 366.4         | 250.3        | 17   | 60 |
| Sa1P(d17:0)        | 368.4         | 252.2        | 17.1 | 60 |
| Sa1P(d18:0)        | 382.4         | 266.4        | 17.7 | 60 |
| ST(d18:1/16:0)     | 780.6         | 264.3        | 37.2 | 60 |
| ST(d18:1/18:0)     | 808.6         | 264.3        | 38.6 | 60 |
| CerP(d18:0/15:0)   | 606.7         | 266.3        | 28.7 | 60 |
| CerP(d18:0/16:0)   | 620.7         | 266.3        | 29.4 | 60 |
| CerP(d18:1/12:0)   | 562.6         | 264.4        | 26.6 | 60 |
| CerP(d18:1/14:0)   | 590.6         | 264.4        | 27.9 | 60 |
| CerP(d18:1/16:0)   | 618.6         | 264.4        | 29.3 | 60 |
| CerP(d18:1/18:0)   | 646.6         | 264.4        | 30.7 | 60 |
| CerP(d18:1/20:0)   | 674.6         | 264.4        | 32.1 | 60 |
| CerP(d18:1/22:0)   | 702.7         | 264.4        | 33.4 | 60 |
| CerP(d18:1/17:0)   | 632.7         | 264.3        | 30   | 60 |
| CerP(d18:1/17:1)   | 630.7         | 264.3        | 29.9 | 60 |
| LacCer(d18:1/16:0) | 862.7         | 264.3        | 41.3 | 60 |
| LacCer(d18:1/18:0) | 890.7         | 264.3        | 42.6 | 60 |
| LacCer(d18:1/20:0) | 918.7         | 264.4        | 44   | 60 |
| LacCer(d18:1/22:0) | 946.8         | 264.3        | 45.4 | 60 |
| LacCer(d18:1/24:1) | 972.8         | 264.3        | 46.7 | 60 |
| LacCer(d18:1/24:0) | 974.8         | 264.3        | 46.8 | 60 |
| LacCer(d18:1/26:0) | 1000.8        | 264.3        | 48   | 60 |
| SM(d18:2/15:0)     | 687.5         | 184.1        | 32.7 | 60 |
| SM(d18:1/14:0)     | 675.6         | 184.1        | 32.1 | 60 |
| SM(d18:1/16:1)     | 701.6         | 184.1        | 33.4 | 60 |
| SM(d18:1/15:0)     | 689.6         | 184.1        | 32.8 | 60 |
| SM(d18:1/16:0)     | 703.6         | 184.1        | 33.5 | 60 |
| SM(d18:1/18:1)     | 729.6         | 184.1        | 34.8 | 60 |
| SM(d19:1/16:0)     | 717.6         | 184.1        | 34.2 | 60 |
| SM(d18:1/17:0)     | 717.61        | 184.1        | 34.2 | 60 |
| SM(d18:1/18:0)     | 731.6         | 184.1        | 34.8 | 60 |
| SM(d18:2/20:0)     | 757.7         | 184.1        | 36.1 | 60 |
| SM(d18:1/22:2)     | 783.7         | 184.1        | 37.4 | 60 |
| SM(d18:1/19:0)     | 745.7         | 184.1        | 35.5 | 60 |
| SM(d18:1/20:0)     | 759.7         | 184.1        | 36.2 | 60 |

|                    |        |       |      |    |
|--------------------|--------|-------|------|----|
| SM(d18:1/22:1)     | 785.7  | 184.1 | 37.5 | 60 |
| SM(d18:2/22:0)     | 785.71 | 184.1 | 37.5 | 60 |
| SM(d18:1/24:2)     | 811.7  | 184.1 | 38.8 | 60 |
| SM(d18:1/21:0)     | 773.7  | 184.1 | 36.9 | 60 |
| SM(d18:1/23:1)     | 799.7  | 184.1 | 38.2 | 60 |
| SM(d18:2/23:0)     | 799.71 | 184.1 | 38.2 | 60 |
| SM(d18:1/22:0)     | 787.7  | 184.1 | 37.6 | 60 |
| SM(d18:1/24:1)     | 813.7  | 184.1 | 38.9 | 60 |
| SM(d18:2/24:0)     | 813.71 | 184.1 | 38.9 | 60 |
| SM(d18:1/23:0)     | 801.7  | 184.1 | 38.3 | 60 |
| SM(d18:1/25:1)     | 827.7  | 184.1 | 39.6 | 60 |
| SM(d18:1/24:0)     | 815.7  | 184.1 | 39   | 60 |
| SM(d18:1/26:0)     | 843.8  | 184.1 | 40.3 | 60 |
| SM(d18:2/18:1)     | 727.6  | 184.1 | 34.7 | 60 |
| SM(d18:2/20:2)     | 753.6  | 184.1 | 35.9 | 60 |
| SM(d18:2/22:2)     | 781.6  | 184.1 | 37.3 | 60 |
| SM(d18:2/22:3)     | 779.6  | 184.1 | 37.2 | 60 |
| SM(d18:1/23:2)     | 797.7  | 184.1 | 38.1 | 60 |
| SM(d18:1/23:3)     | 795.6  | 184.1 | 38   | 60 |
| SM(d18:1/24:3)     | 809.7  | 184.1 | 38.7 | 60 |
| SM(d18:2/24:3)     | 807.6  | 184.1 | 38.6 | 60 |
| SM(d18:1/25:0)     | 829.7  | 184.1 | 39.7 | 60 |
| SM(d18:1/25:3)     | 823.7  | 184.1 | 39.4 | 60 |
| SM(d18:1/26:3)     | 837.7  | 184.1 | 40   | 60 |
| DHSM(d18:0/14:0)   | 677.6  | 184.1 | 32.2 | 60 |
| DHSM(d18:0/15:0)   | 691.6  | 184.1 | 32.9 | 60 |
| DHSM(d18:0/16:0)   | 705.6  | 184.1 | 33.6 | 60 |
| DHSM(d18:0/17:0)   | 719.6  | 184.1 | 34.3 | 60 |
| DHSM(d18:0/18:0)   | 733.7  | 184.1 | 35   | 60 |
| DHSM(d18:0/19:0)   | 747.7  | 266.3 | 35.6 | 60 |
| DHSM(d18:0/19:1)   | 745.7  | 266.3 | 35.5 | 60 |
| DHSM(d18:0/20:0)   | 761.7  | 184.1 | 36.3 | 60 |
| DHSM(d18:0/22:0)   | 789.7  | 184.1 | 37.7 | 60 |
| DHSM(d18:0/23:0)   | 803.7  | 184.1 | 38.4 | 60 |
| DHSM(d18:0/24:0)   | 817.7  | 184.1 | 39.1 | 60 |
| HexCer(d18:1/16:0) | 700.6  | 264.3 | 33.3 | 60 |
| HexCer(d18:1/18:0) | 728.6  | 264.3 | 34.7 | 60 |
| HexCer(d18:1/20:0) | 756.7  | 264.3 | 36.1 | 60 |
| HexCer(d18:1/22:0) | 784.7  | 264.3 | 37.5 | 60 |
| HexCer(d18:1/24:1) | 810.7  | 264.3 | 38.7 | 60 |
| HexCer(d18:0/20:0) | 758.7  | 266.3 | 36.2 | 60 |
| HexCer(d18:1/24:0) | 812.7  | 264   | 38.8 | 60 |
| Cer(d18:1/14:0)    | 510.7  | 264.3 | 24   | 60 |
| Cer(d18:1/16:1)    | 536.6  | 264.3 | 25.3 | 60 |
| Cer(d18:1/16:0)    | 538.5  | 264.3 | 25.4 | 60 |
| Cer(d18:1/18:1)    | 564.5  | 264.3 | 26.7 | 60 |
| Cer(d18:0/16:0)    | 540.5  | 266.3 | 25.5 | 60 |
| Cer(d18:1/17:0)    | 552.5  | 264.3 | 26.1 | 60 |
| Cer(d18:1/18:0)    | 566.6  | 264.3 | 26.8 | 60 |

|                 |        |       |      |    |
|-----------------|--------|-------|------|----|
| Cer(d18:2/20:0) | 592.6  | 262.3 | 28   | 60 |
| Cer(d18:1/20:0) | 594.6  | 264.3 | 28.1 | 60 |
| Cer(d18:2/22:0) | 620.6  | 262.3 | 29.4 | 60 |
| Cer(d18:1/23:1) | 634.6  | 264.3 | 30.1 | 60 |
| Cer(d18:2/23:0) | 634.6  | 262.3 | 30.1 | 60 |
| Cer(d18:1/24:1) | 648.7  | 264.3 | 30.8 | 60 |
| Cer(d18:1/23:0) | 636.6  | 264.3 | 30.2 | 60 |
| Cer(d18:1/24:0) | 650.7  | 264.3 | 30.9 | 60 |
| Cer(d18:1/26:1) | 676.7  | 264.3 | 32.2 | 60 |
| Cer(d18:1/26:0) | 678.7  | 264.3 | 32.3 | 60 |
| Cer(d18:1/22:0) | 622.7  | 264.3 | 29.5 | 60 |
| Cer(d18:0/23:2) | 634.7  | 266.3 | 30.1 | 60 |
| Cer(d18:0/23:3) | 632.7  | 266.3 | 30   | 60 |
| Cer(d18:0/24:1) | 650.7  | 266.3 | 30.9 | 60 |
| (IS)C17So       | 286.45 | 268.2 | 13   | 60 |

**Table S2. ROC analysis for differential sphingolipids metabolites.**

|                    | AUC   | P value | 95%CI       |
|--------------------|-------|---------|-------------|
| ST(d18:1/16:0)     | 0.776 | <0.001  | 0.685-0.867 |
| ST(d18:1/18:0)     | 0.817 | <0.001  | 0.724-0.91  |
| CerP(d18:1/18:0)   | 0.655 | 0.008   | 0.548-0.763 |
| LacCer(d18:1/20:0) | 0.690 | 0.001   | 0.587-0.794 |
| LacCer(d18:1/22:0) | 0.706 | <0.001  | 0.603-0.809 |
| LacCer(d18:1/24:1) | 0.639 | 0.018   | 0.529-0.748 |
| LacCer(d18:1/24:0) | 0.681 | 0.002   | 0.575-0.788 |
| SM(d18:1/21:0)     | 0.125 | <0.001  | 0.056-0.194 |
| SM(d18:1/23:1)     | 0.101 | <0.001  | 0.042-0.161 |
| SM(d18:2/23:0)     | 0.109 | <0.001  | 0.047-0.171 |
| SM(d18:1/23:0)     | 0.104 | <0.001  | 0.045-0.162 |
| SM(d18:1/25:3)     | 0.170 | <0.001  | 0.088-0.253 |
| SM(d18:1/26:3)     | 0.152 | <0.001  | 0.075-0.228 |
| CerP(d18:1/17:0)   | 0.811 | <0.001  | 0.725-0.896 |
| CerP(d18:1/17:1)   | 0.699 | <0.001  | 0.596-0.802 |

**Table S3. Normalized peak area of differential sphingolipids metabolites.**

| group  | ST(d18:1/16:0) | ST(d18:1/18:0) | LacCer(d18:1/20:0) | LacCer(d18:1/24:0) | SM(d18:1/21:0) | SM(d18:1/23:1) | SM(d18:2/23:0) | SM(d18:1/25:3) | SM(d18:1/26:3) | CerP(d18:1/17:0) | CerP(d18:1/17:1) | CerP(d18:1/18:0) |
|--------|----------------|----------------|--------------------|--------------------|----------------|----------------|----------------|----------------|----------------|------------------|------------------|------------------|
| cancer | 33.377         | 14.603         | 2.384              | 1.192              | 0.596          | 0.596          | 0.298          | 0.298          | 0.298          | 136.039          | 18.476           | 14.900           |
| cancer | 47.094         | 30.385         | 1.115              | 6.412              | 0.558          | 1.951          | 0.558          | 0.557          | 0.557          | 25.367           | 22.850           | 3.066            |
| cancer | 29.624         | 19.455         | 0.884              | 3.095              | 0.884          | 0.884          | 0.884          | 0.221          | 0.221          | 23.655           | 70.744           | 2.653            |
| cancer | 17.164         | 20.555         | 1.271              | 5.933              | 0.636          | 0.636          | 0.212          | 0.212          | 0.636          | 6.359            | 18.230           | 4.238            |
| cancer | 23.120         | 24.574         | 0.582              | 1.454              | 0.291          | 1.744          | 1.600          | 0.145          | 0.145          | 23.839           | 30.380           | 5.962            |
| cancer | 13.998         | 11.181         | 0.418              | 3.553              | 0.105          | 0.836          | 0.941          | 0.104          | 0.104          | 60.244           | 38.300           | 2.821            |
| cancer | 17.447         | 11.478         | 0.574              | 5.051              | 0.344          | 1.377          | 0.229          | 0.115          | 0.115          | 6.198            | 8.377            | 4.017            |
| cancer | 11.013         | 0.482          | 0.116              | 0.019              | 3.440          | 1.676          | 3.420          | 0.376          | 1.484          | 6.949            | 1.050            | 1.637            |
| cancer | 3.709          | 7.855          | 0.364              | 3.418              | 0.218          | 0.873          | 0.073          | 0.073          | 0.073          | 6.762            | 1.818            | 2.473            |
| cancer | 1.809          | 3.556          | 0.254              | 1.080              | 0.063          | 0.159          | 0.286          | 0.064          | 0.032          | 4.061            | 1.746            | 0.699            |

---

|         |        |        |       |       |       |       |       |       |       |         |        |       |
|---------|--------|--------|-------|-------|-------|-------|-------|-------|-------|---------|--------|-------|
| cancer  | 19.803 | 13.202 | 6.599 | 6.599 | 6.599 | 6.601 | 6.599 | 6.599 | 6.599 | 26.404  | 13.202 | 6.599 |
| cancer  | 1.461  | 1.500  | 0.154 | 0.961 | 0.115 | 0.038 | 0.308 | 0.038 | 0.038 | 18.530  | 7.650  | 0.692 |
| cancer  | 2.059  | 2.257  | 0.435 | 0.950 | 0.158 | 0.040 | 0.238 | 0.119 | 0.040 | 73.050  | 13.762 | 0.515 |
| cancer  | 0.976  | 2.139  | 0.225 | 1.051 | 0.075 | 0.450 | 0.075 | 0.075 | 0.038 | 20.860  | 7.241  | 0.488 |
| cancer  | 7.577  | 16.073 | 0.459 | 0.230 | 3.675 | 5.281 | 5.168 | 0.230 | 1.148 | 48.465  | 11.944 | 5.512 |
| cancer  | 1.886  | 2.179  | 0.228 | 0.911 | 0.130 | 0.098 | 0.130 | 0.033 | 0.033 | 21.588  | 1.920  | 0.748 |
| cancer  | 2.225  | 3.107  | 0.422 | 1.074 | 0.230 | 0.153 | 0.268 | 0.077 | 0.008 | 4.638   | 1.036  | 0.460 |
| cancer  | 1.552  | 1.620  | 0.069 | 0.552 | 0.103 | 0.345 | 0.448 | 0.138 | 0.103 | 5.173   | 0.862  | 0.655 |
| cancer  | 1.096  | 1.096  | 0.152 | 0.518 | 0.548 | 0.518 | 0.548 | 0.061 | 0.091 | 3.014   | 1.188  | 0.213 |
| cancer  | 0.883  | 1.060  | 0.247 | 0.495 | 1.201 | 0.495 | 0.212 | 0.177 | 0.283 | 7.173   | 1.342  | 0.318 |
| cancer  | 0.977  | 1.162  | 0.211 | 0.686 | 1.584 | 0.317 | 0.291 | 0.132 | 0.832 | 0.528   | 0.158  | 0.343 |
| cancer  | 0.752  | 0.865  | 0.075 | 0.451 | 4.382 | 1.392 | 1.354 | 0.564 | 1.936 | 5.414   | 0.602  | 0.376 |
| cancer  | 1.073  | 2.146  | 0.330 | 0.619 | 2.023 | 0.949 | 0.991 | 0.537 | 1.796 | 1.775   | 0.454  | 0.248 |
| cancer  | 1.658  | 1.859  | 0.503 | 1.005 | 4.320 | 0.452 | 0.603 | 0.151 | 0.528 | 2.864   | 0.201  | 0.754 |
| cancer  | 1.010  | 2.074  | 0.106 | 0.372 | 2.711 | 0.904 | 0.904 | 0.638 | 2.153 | 17.390  | 0.851  | 0.691 |
| cancer  | 2.162  | 1.393  | 0.144 | 0.721 | 3.362 | 1.057 | 1.153 | 0.576 | 1.874 | 2.690   | 0.817  | 0.384 |
| cancer  | 3.011  | 3.338  | 0.065 | 0.524 | 4.384 | 1.112 | 0.982 | 0.916 | 2.291 | 11.914  | 0.851  | 0.589 |
| cancer  | 2.350  | 1.176  | 0.044 | 0.696 | 4.135 | 0.479 | 0.827 | 1.132 | 3.636 | 10.080  | 0.566  | 0.218 |
| cancer  | 1.411  | 0.940  | 0.007 | 0.977 | 5.283 | 1.158 | 1.592 | 1.121 | 3.219 | 0.868   | 0.253  | 0.253 |
| cancer  | 0.740  | 1.048  | 0.031 | 0.586 | 2.943 | 1.310 | 1.187 | 0.924 | 2.295 | 1.787   | 0.216  | 0.308 |
| cancer  | 0.421  | 0.368  | 0.053 | 0.228 | 2.760 | 1.130 | 1.016 | 0.893 | 1.972 | 1.139   | 0.088  | 0.088 |
| cancer  | 0.972  | 0.476  | 0.020 | 0.099 | 2.280 | 1.169 | 1.160 | 1.091 | 1.884 | 9.140   | 0.278  | 0.040 |
| cancer  | 0.580  | 0.844  | 0.053 | 0.176 | 2.312 | 0.615 | 0.440 | 0.580 | 1.204 | 2.498   | 1.706  | 0.123 |
| cancer  | 1.052  | 0.318  | 0.033 | 0.153 | 1.607 | 0.494 | 0.691 | 1.031 | 1.875 | 0.230   | 0.186  | 0.110 |
| cancer  | 1.637  | 0.919  | 0.029 | 0.287 | 3.319 | 1.063 | 1.207 | 0.920 | 1.437 | 2.759   | 0.948  | 0.144 |
| cancer  | 2.402  | 1.235  | 0.200 | 0.667 | 3.673 | 0.668 | 0.968 | 0.851 | 1.301 | 1.235   | 0.467  | 0.267 |
| cancer  | 0.607  | 0.429  | 0.018 | 0.250 | 2.563 | 0.938 | 1.715 | 0.759 | 1.367 | 0.214   | 0.071  | 0.125 |
| cancer  | 1.912  | 2.185  | 0.341 | 0.102 | 2.013 | 4.929 | 3.071 | 0.973 | 1.963 | 19.605  | 0.444  | 6.776 |
| cancer  | 0.244  | 0.679  | 0.027 | 0.109 | 3.257 | 2.552 | 2.579 | 1.901 | 3.393 | 2.172   | 0.978  | 0.081 |
| cancer  | 0.704  | 0.183  | 0.104 | 0.313 | 4.615 | 1.343 | 3.415 | 0.717 | 2.099 | 0.365   | 0.130  | 0.365 |
| cancer  | 0.391  | 0.224  | 0.028 | 0.140 | 5.075 | 4.166 | 3.264 | 1.090 | 3.900 | 0.266   | 0.112  | 0.098 |
| cancer  | 0.253  | 0.199  | 0.004 | 0.217 | 4.656 | 6.206 | 3.067 | 0.893 | 2.445 | 0.180   | 0.144  | 0.162 |
| cancer  | 1.435  | 0.763  | 0.183 | 0.305 | 3.679 | 3.985 | 2.580 | 1.236 | 3.634 | 6.411   | 1.222  | 0.244 |
| cancer  | 0.442  | 0.327  | 0.019 | 0.404 | 5.969 | 3.326 | 3.382 | 2.517 | 4.497 | 2.383   | 0.769  | 0.096 |
| cancer  | 22.300 | 8.259  | 0.688 | 0.551 | 0.413 | 1.377 | 1.238 | 0.413 | 0.275 | 16.105  | 2.340  | 2.202 |
| cancer  | 1.271  | 1.078  | 0.039 | 0.308 | 5.084 | 3.427 | 4.198 | 0.462 | 3.640 | 9.190   | 1.887  | 0.193 |
| cancer  | 0.067  | 0.089  | 0.044 | 0.156 | 5.655 | 4.031 | 4.888 | 1.189 | 2.754 | 1.444   | 0.555  | 0.044 |
| cancer  | 0.923  | 0.879  | 0.132 | 0.879 | 3.099 | 6.153 | 2.549 | 1.143 | 1.978 | 0.791   | 0.132  | 0.352 |
| cancer  | 1.353  | 0.742  | 0.131 | 0.436 | 2.161 | 3.296 | 4.278 | 1.484 | 1.921 | 5.937   | 1.441  | 0.044 |
| cancer  | 1.000  | 0.846  | 0.231 | 0.731 | 3.712 | 3.617 | 3.521 | 1.500 | 1.923 | 0.615   | 0.231  | 0.308 |
| cancer  | 0.437  | 0.553  | 0.058 | 0.728 | 4.340 | 2.010 | 1.529 | 1.252 | 1.544 | 6.479   | 1.893  | 0.146 |
| cancer  | 0.416  | 0.167  | 0.062 | 0.604 | 1.562 | 3.103 | 3.883 | 0.895 | 1.353 | 6.830   | 0.604  | 0.125 |
| cancer  | 21.954 | 9.283  | 1.811 | 0.453 | 1.585 | 0.905 | 2.038 | 0.226 | 0.453 | 199.305 | 33.395 | 2.942 |
| cancer  | 1.086  | 1.217  | 0.197 | 1.316 | 2.188 | 2.582 | 3.191 | 1.218 | 1.464 | 0.756   | 0.395  | 0.395 |
| cancer  | 0.884  | 0.746  | 0.028 | 0.552 | 3.452 | 2.500 | 3.204 | 0.635 | 2.210 | 0.304   | 0.249  | 0.166 |
| cancer  | 1.574  | 0.900  | 0.112 | 0.787 | 4.646 | 4.779 | 4.760 | 1.274 | 2.267 | 0.599   | 0.187  | 0.225 |
| cancer  | 1.949  | 1.379  | 0.143 | 0.190 | 8.418 | 5.158 | 2.781 | 1.569 | 3.044 | 5.089   | 5.897  | 0.285 |
| control | 0.555  | 0.392  | 0.065 | 0.229 | 2.353 | 1.699 | 0.882 | 0.948 | 1.650 | 4.019   | 2.777  | 0.163 |
| control | 0.917  | 0.478  | 0.040 | 0.239 | 3.267 | 1.096 | 1.435 | 1.076 | 1.654 | 3.508   | 2.232  | 0.199 |

---

---

|         |        |        |       |       |       |       |       |       |       |         |        |        |
|---------|--------|--------|-------|-------|-------|-------|-------|-------|-------|---------|--------|--------|
| control | 1.014  | 0.420  | 0.074 | 0.445 | 3.649 | 1.583 | 2.473 | 0.989 | 1.892 | 5.863   | 0.495  | 0.099  |
| control | 1.065  | 0.479  | 0.080 | 0.719 | 2.037 | 1.545 | 0.945 | 1.224 | 1.665 | 0.825   | 0.293  | 0.293  |
| control | 0.664  | 0.260  | 0.058 | 0.693 | 2.557 | 2.022 | 1.097 | 0.404 | 1.675 | 0.260   | 0.173  | 0.376  |
| control | 0.753  | 0.474  | 0.112 | 0.335 | 2.552 | 2.371 | 1.827 | 0.613 | 1.478 | 0.502   | 0.251  | 0.139  |
| control | 0.604  | 0.529  | 0.076 | 0.352 | 6.607 | 2.592 | 2.227 | 0.918 | 1.762 | 0.403   | 0.101  | 0.151  |
| control | 0.795  | 0.513  | 0.026 | 0.333 | 5.166 | 2.473 | 3.115 | 1.308 | 2.883 | 0.256   | 0.205  | 0.179  |
| control | 0.337  | 0.389  | 0.005 | 0.285 | 5.797 | 2.568 | 2.347 | 0.700 | 2.438 | 0.389   | 0.130  | 0.156  |
| control | 0.781  | 0.364  | 0.104 | 0.130 | 3.616 | 2.913 | 3.746 | 1.249 | 2.160 | 1.197   | 0.156  | 0.130  |
| control | 1.466  | 1.324  | 0.284 | 0.567 | 5.486 | 3.947 | 5.840 | 0.875 | 1.868 | 1.229   | 0.615  | 0.331  |
| control | 1.403  | 1.479  | 0.152 | 0.417 | 5.005 | 4.175 | 3.965 | 0.987 | 2.733 | 0.607   | 0.303  | 0.493  |
| control | 0.622  | 0.322  | 0.023 | 0.438 | 8.189 | 5.506 | 5.596 | 0.921 | 4.444 | 0.345   | 0.207  | 0.184  |
| control | 0.329  | 0.312  | 0.003 | 0.345 | 8.128 | 6.184 | 5.462 | 1.018 | 4.846 | 0.246   | 0.230  | 0.115  |
| control | 0.547  | 0.445  | 0.142 | 0.202 | 5.428 | 5.204 | 4.799 | 1.073 | 4.375 | 0.425   | 0.081  | 0.243  |
| control | 0.839  | 0.528  | 0.062 | 0.684 | 3.418 | 4.134 | 3.620 | 0.901 | 3.495 | 0.218   | 0.186  | 0.404  |
| control | 0.349  | 0.206  | 0.095 | 0.318 | 3.956 | 3.438 | 4.217 | 1.033 | 2.574 | 0.381   | 0.143  | 0.127  |
| control | 0.431  | 0.478  | 0.048 | 0.311 | 4.881 | 2.858 | 3.695 | 1.053 | 3.972 | 0.407   | 0.048  | 0.191  |
| control | 0.676  | 0.246  | 0.102 | 0.184 | 3.555 | 3.287 | 4.466 | 1.209 | 3.340 | 0.348   | 0.082  | 0.184  |
| control | 0.374  | 0.156  | 0.047 | 0.156 | 3.510 | 4.943 | 4.344 | 1.435 | 2.698 | 3.970   | 1.076  | 0.078  |
| control | 0.492  | 0.138  | 0.003 | 0.077 | 2.998 | 4.772 | 5.103 | 1.122 | 2.275 | 1.814   | 0.707  | 0.092  |
| control | 0.548  | 0.329  | 0.044 | 0.088 | 3.103 | 4.190 | 4.464 | 1.031 | 1.689 | 0.987   | 0.877  | 0.088  |
| control | 0.883  | 0.390  | 0.130 | 0.338 | 4.196 | 4.144 | 5.248 | 1.091 | 2.208 | 0.494   | 0.234  | 0.234  |
| control | 0.678  | 0.261  | 0.052 | 0.209 | 3.600 | 4.160 | 3.196 | 1.474 | 2.479 | 0.678   | 0.287  | 0.313  |
| control | 0.430  | 0.331  | 0.033 | 0.248 | 5.811 | 4.919 | 4.266 | 1.438 | 2.975 | 0.248   | 0.066  | 0.132  |
| control | 0.576  | 0.221  | 0.022 | 0.177 | 6.079 | 5.027 | 4.197 | 1.262 | 2.945 | 0.664   | 0.509  | 0.199  |
| control | 0.487  | 0.339  | 0.212 | 0.106 | 7.194 | 4.554 | 4.533 | 1.865 | 3.771 | 0.254   | 0.297  | 0.233  |
| control | 0.502  | 0.177  | 0.059 | 0.443 | 7.164 | 7.058 | 5.567 | 2.127 | 3.693 | 1.063   | 0.384  | 0.118  |
| control | 1.039  | 0.286  | 0.104 | 0.156 | 6.894 | 4.180 | 6.346 | 1.363 | 3.661 | 2.362   | 0.623  | 0.338  |
| control | 0.903  | 0.319  | 0.053 | 0.292 | 6.191 | 5.183 | 5.037 | 1.422 | 3.615 | 1.727   | 0.585  | 0.345  |
| control | 0.557  | 0.342  | 0.108 | 0.144 | 6.303 | 6.598 | 5.950 | 1.276 | 3.793 | 0.216   | 0.108  | 0.144  |
| control | 1.097  | 0.406  | 0.005 | 0.239 | 5.844 | 6.190 | 5.607 | 1.479 | 4.723 | 0.620   | 0.215  | 0.262  |
| control | 0.571  | 0.507  | 0.032 | 0.190 | 5.392 | 6.455 | 4.011 | 1.427 | 2.759 | 0.412   | 0.190  | 0.159  |
| control | 0.464  | 0.401  | 0.042 | 0.148 | 5.731 | 6.027 | 5.022 | 1.477 | 3.893 | 0.506   | 0.317  | 0.127  |
| control | 0.960  | 0.306  | 0.022 | 0.218 | 4.856 | 4.442 | 4.681 | 1.463 | 2.794 | 0.895   | 0.393  | 0.131  |
| control | 0.660  | 0.462  | 0.066 | 0.198 | 4.970 | 3.798 | 3.880 | 0.991 | 2.708 | 0.925   | 1.057  | 0.330  |
| control | 0.487  | 0.257  | 0.051 | 0.180 | 5.505 | 5.080 | 3.875 | 1.386 | 2.360 | 0.513   | 0.128  | 0.180  |
| control | 0.504  | 0.394  | 0.044 | 0.131 | 6.437 | 4.697 | 4.784 | 1.511 | 2.770 | 1.445   | 0.701  | 0.241  |
| control | 0.275  | 0.236  | 0.020 | 0.118 | 4.954 | 4.549 | 4.354 | 1.199 | 3.488 | 0.983   | 0.766  | 0.118  |
| control | 0.303  | 0.250  | 0.004 | 0.036 | 5.225 | 4.678 | 3.561 | 1.214 | 3.203 | 0.661   | 0.411  | 0.071  |
| control | 0.281  | 0.243  | 0.037 | 0.131 | 5.952 | 3.762 | 3.491 | 1.441 | 2.910 | 0.075   | 0.150  | 0.056  |
| control | 0.198  | 0.054  | 0.018 | 0.054 | 5.828 | 3.784 | 4.785 | 1.117 | 3.162 | 1.045   | 0.324  | 0.036  |
| control | 0.393  | 0.476  | 0.083 | 0.062 | 5.881 | 4.506 | 4.361 | 1.347 | 2.351 | 0.207   | 0.145  | 0.104  |
| control | 0.881  | 0.407  | 0.034 | 0.441 | 5.052 | 2.746 | 3.458 | 0.712 | 2.323 | 1.525   | 1.152  | 0.203  |
| control | 0.121  | 0.048  | 0.005 | 0.024 | 4.554 | 3.865 | 3.658 | 1.114 | 2.798 | 0.266   | 0.291  | 0.242  |
| control | 0.584  | 0.424  | 0.080 | 0.239 | 4.458 | 3.503 | 3.158 | 1.327 | 1.791 | 0.398   | 0.159  | 0.186  |
| polyp   | 3.455  | 27.870 | 0.691 | 1.152 | 0.691 | 2.073 | 0.461 | 0.230 | 0.230 | 291.241 | 8.986  | 2.303  |
| polyp   | 60.159 | 36.023 | 1.801 | 2.522 | 0.360 | 1.801 | 3.602 | 0.720 | 0.360 | 47.206  | 6.124  | 11.527 |
| polyp   | 35.546 | 31.507 | 0.588 | 3.231 | 0.294 | 1.028 | 1.616 | 0.147 | 0.147 | 13.068  | 15.863 | 2.938  |
| polyp   | 1.301  | 1.970  | 0.112 | 1.004 | 0.074 | 0.112 | 0.372 | 0.074 | 0.037 | 28.559  | 5.169  | 0.483  |
| polyp   | 1.344  | 0.873  | 0.202 | 0.470 | 3.039 | 0.537 | 0.537 | 0.235 | 0.940 | 14.456  | 0.638  | 0.370  |

---

---

|       |       |       |       |       |       |       |       |       |       |       |       |       |
|-------|-------|-------|-------|-------|-------|-------|-------|-------|-------|-------|-------|-------|
| polyp | 3.435 | 2.322 | 0.194 | 0.581 | 2.467 | 1.306 | 0.774 | 0.194 | 2.709 | 2.128 | 0.145 | 0.581 |
| polyp | 0.995 | 0.862 | 0.033 | 0.464 | 3.417 | 0.929 | 1.161 | 0.265 | 2.256 | 6.716 | 1.128 | 0.133 |
| polyp | 1.243 | 5.266 | 0.414 | 1.716 | 2.011 | 1.065 | 0.592 | 0.177 | 2.011 | 2.130 | 0.414 | 0.769 |

---
